# Supplementary material for: Evaluation of Parkinson’s disease early diagnosis using single-channel EEG features and auditory cognitive assessment
Source: Frontiers journal article supplement (doi:10.3389/fneur.2023.1273458), 2023-12-19
Supplement: Data_Sheet_2.pdf [file Data_Sheet_2.pdf]

## *Supplementary Material B*

### **Evaluation of Parkinson's disease early diagnosis using single-channel EEG features and auditory cognitive assessment**

**Lior Molcho<sup>†1\*</sup>, Neta B. Maimon<sup>†1,2</sup>, Neomi Hezi<sup>5</sup>, Talya Zeimer<sup>1</sup>, Nathan Intrator<sup>1,3,4</sup>, Tanya Gurevich<sup>4,5,6</sup>**

<sup>1</sup> Neurosteer Inc, NYC, New York, USA

<sup>2</sup> School of Psychological Sciences, Tel Aviv University, Tel Aviv, Israel

<sup>3</sup> Blavatnik School of Computer Science, Tel-Aviv University, Tel-Aviv, Israel;

<sup>4</sup> Sagol School of Neuroscience, Tel Aviv University, Tel Aviv, Israel

<sup>5</sup> Movement Disorders Unit, Neurological Institute, Tel Aviv Sourasky Medical Center.

<sup>6</sup> Faculty of Medicine, Tel-Aviv University, Israel

### **Demographic results**

To ensure that the groups were well-balanced we compared some demographic characteristics of each group. Table 1 presents descriptive information regarding the motor symptoms side. The table presents the group association, gender and laterality of the motor symptoms of the patients. Data of 29 patients was collected, 3 additional patients did not have this data in their record.

| <b>Study group</b> | <b>PD medications</b>             | <b>Count</b> |
|--------------------|-----------------------------------|--------------|
| Negative           | Sinemet CR (Levodopa / carbidopa) | 1            |
|                    | Propranolol                       | 1            |
|                    | Rasagiline                        | 1            |
|                    | Amantadine                        | 1            |
| Positive           | Sinemet CR (Levodopa / carbidopa) | 4            |
|                    | Rasagiline                        | 9            |
|                    | Amantadine                        | 8            |
|                    | Levodopa/ carbidopa/entacapone    | 2            |
|                    | levodopa/carbidopa                | 8            |
|                    | levodopa/ benserazide             | 1            |

|  |                                |   |
|--|--------------------------------|---|
|  | Pramipexol                     | 2 |
|  | Losartan + Hydrochlorothiazide | 1 |
|  | ISOSORBIDE MONONITRATE         | 1 |
|  | Propranolol                    | 1 |
|  | Gabapentin                     | 1 |
|  | Mirtazapine                    | 1 |
|  | Aspirin                        | 1 |
|  | Rasagiline                     | 1 |
|  | Simvastatin                    | 1 |
|  | Losartan                       | 1 |
|  | Trihexyphenidyl                | 1 |

**Table 1.** PD medications given at the time of the auditory test for patients holding a valid F-DOPA test result.

| Study group | Gender | Motor symptom side | Count |
|-------------|--------|--------------------|-------|
| Negative    | Female | Bilateral          | 1     |
|             |        | L                  | 1     |
|             |        | R                  | 2     |
|             | Male   | Bilateral          | 1     |
| Positive    | Female | Bilateral          | 4     |
|             |        | L                  | 2     |
|             |        | R                  | 5     |
|             | Male   | Bilateral          | 4     |
|             |        | L                  | 2     |
|             |        | R                  | 7     |

**Table 2.** Motor symptom laterality information for patients holding a valid F-DOPA test result.

## Bayesian results

Quantitative analysis using Bayesian Mann-Whitney U tests was performed to determine the similarity between the groups. This follow-up analysis was conducted using a data augmentation algorithm with 5 chains of 1000 iterations. We report the  $BF_{01}$  (i.e., the null hypothesis that  $H_0$  is not different from  $H_1$ ) of the Bayesian U tests between controls vs. negative; and positive vs. unknown, and the  $BF_{10}$  (i.e., the hypothesis that  $H_0$  is different from  $H_1$ ) of the Bayesian U tests between control vs. positive; and control vs. unknown groups.

Bayesian Mann-Whitney U tests revealed strong evidence that the predicted results of the control group differ from positive F-DOPA patients ( $BF_{10} = 121.88$ ,  $W = 385$ ,  $R^2 = 1.04$ ), and presented moderate evidence of similarity to the negatively labeled F-DOPA group ( $BF_{01} = 2.97$ ,  $W = 116$ ,  $R^2 = 1.21$ ). The group with unknown labels, who were all given positive predictor results, was strongly evident to differ from the control group ( $BF_{10} = 149.48$ ,  $W = 550$ ,  $R^2 = 1.032$ ), and showed moderate evidence of similarity to the positive group ( $BF_{01} = 2.145$ ,  $W = 98$ ,  $R^2 = 1$ ). The U tests outputs and figures are presented in tables 2-5 and figures 1-4.

|                                 | $BF_{01}$ | W       | $R^2$ |
|---------------------------------|-----------|---------|-------|
| Prediction healthy vs. negative | 2.793     | 116.000 | 1.028 |

**Table 2.** Bayesian Mann-Whitney U test for prediction healthy vs. negative groups.

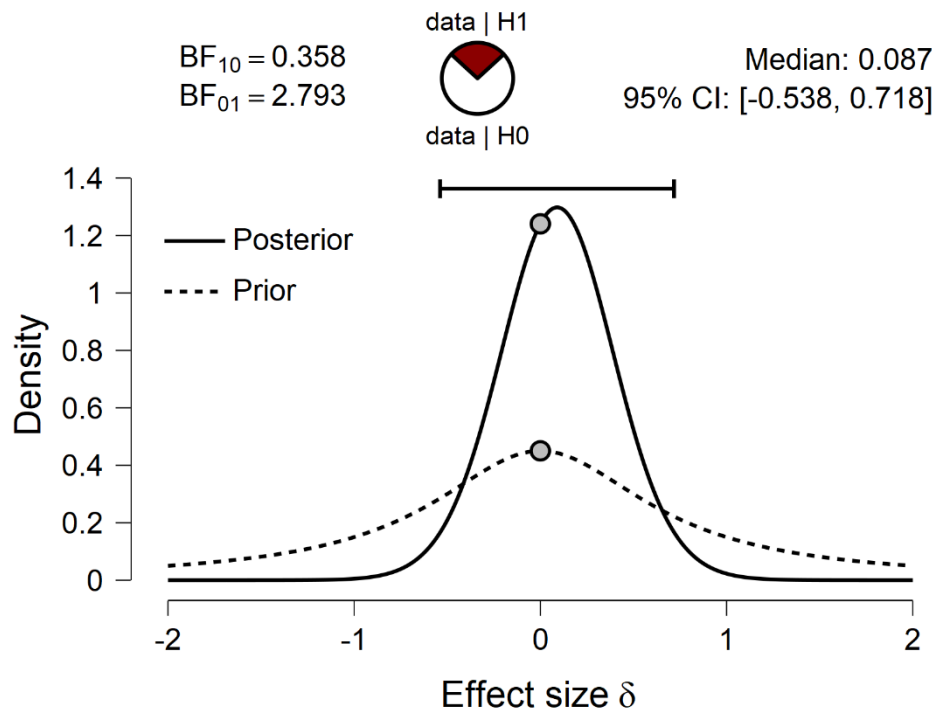

**Figure 1.** Inferential plots prediction healthy vs. negative groups prior and posterior.

|                                 | $BF_{10}$ | $W$     | $R^2$ |
|---------------------------------|-----------|---------|-------|
| Prediction healthy vs. positive | 121.881   | 385.000 | 1.043 |

**Table 3.** Bayesian Mann-Whitney U test of prediction healthy vs. positive groups.

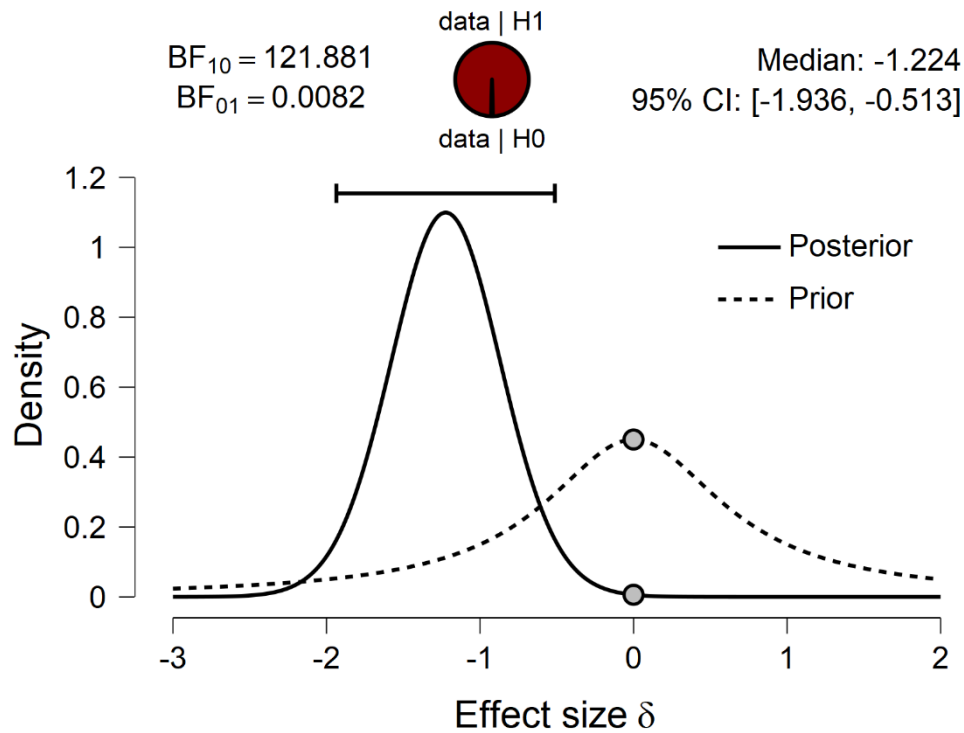

**Figure 2.** Inferential plots prediction healthy vs. positive groups prior and posterior.

|                                | $BF_{10}$ | $W$     | $R^2$ |
|--------------------------------|-----------|---------|-------|
| Prediction healthy vs. unknown | 149.481   | 550.000 | 1.032 |

**Table 4.** Bayesian Mann-Whitney U test for prediction healthy vs. unknown groups.

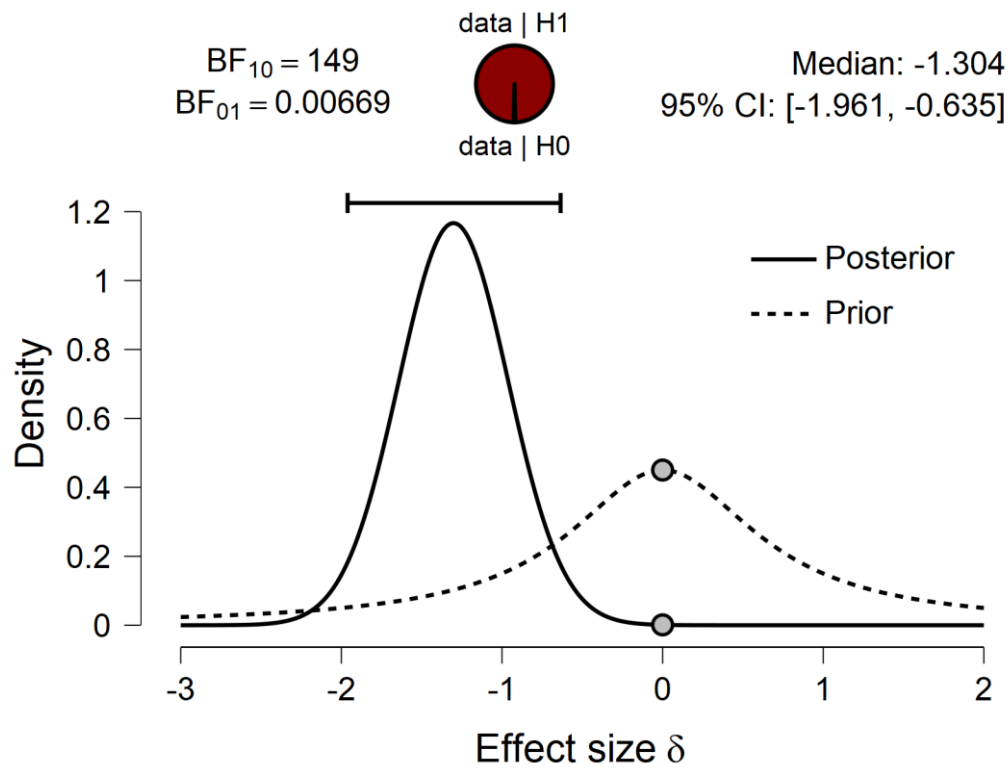

**Figure 3.** Inferential plots prediction healthy vs. unknown groups prior and posterior.

|                                 | $BF_{01}$ | $W$    | $R^2$ |
|---------------------------------|-----------|--------|-------|
| Prediction positive vs. unknown | 2.145     | 98.000 | 1.000 |

**Table 5.** Bayesian Mann-Whitney U test for prediction positive vs. unknown groups.

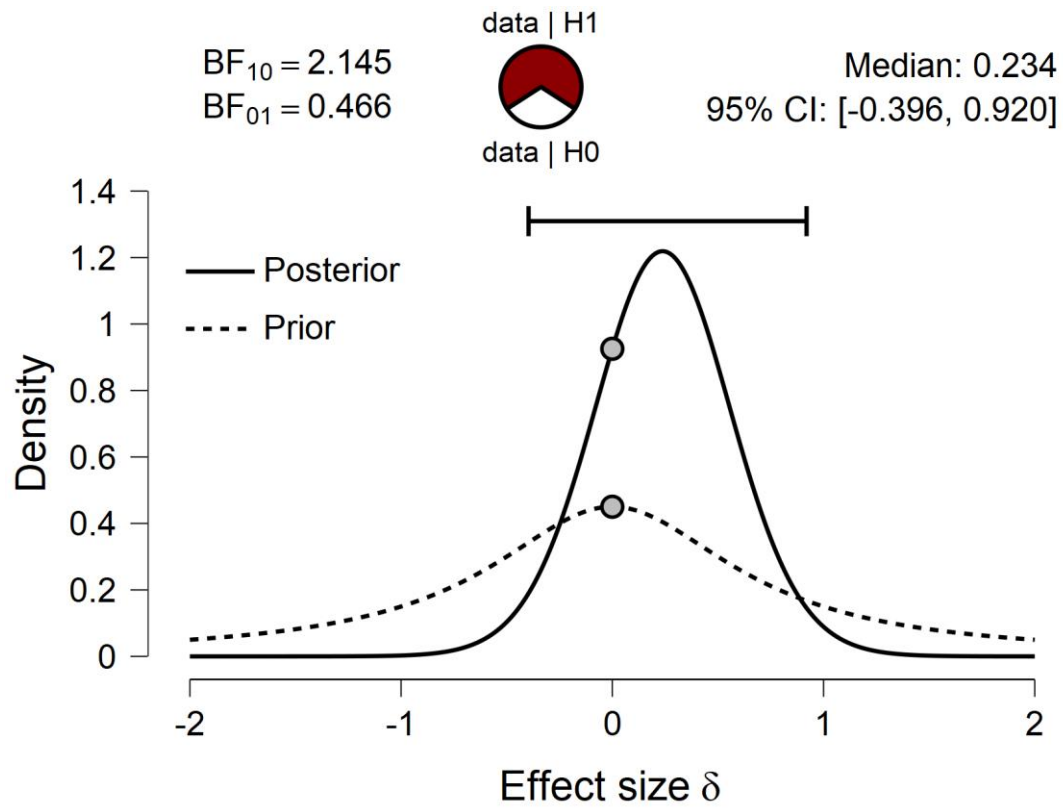

**Figure 4.** Inferential plots prediction positive vs. unknown groups prior and posterior.
